# Supplementary material
Source: PubMed Central journal article supplement (PMC3851227)
Supplement: mabs-5-748-s01.pdf [file mabs-5-748-s01.pdf]

**Supplemental Material to:**

**Hailan Pao, Chien-Tsun Kuan, Vidya Chandramohan, Stephen T Keir, Charles N Pegram, Xuhui Bao, Jan-Eric Mansson, Ira H Pastan, and Darell D Bigner**

**Affinity-matured recombinant immunotoxin targeting gangliosides 3'-isoLM1 and 3'.6'-isoLD1 on malignant gliomas**

**2013; mAbs 5(5)**

**<http://dx.doi.org/10.4161/mabs.25860>**

**<http://www.landesbioscience.com/journals/mabs/article/25860/>**

## Supplementary Figure 1.

### Apparent Affinities of DmAb14-IT Parental and DmAb14m-IT on D54MG Cells

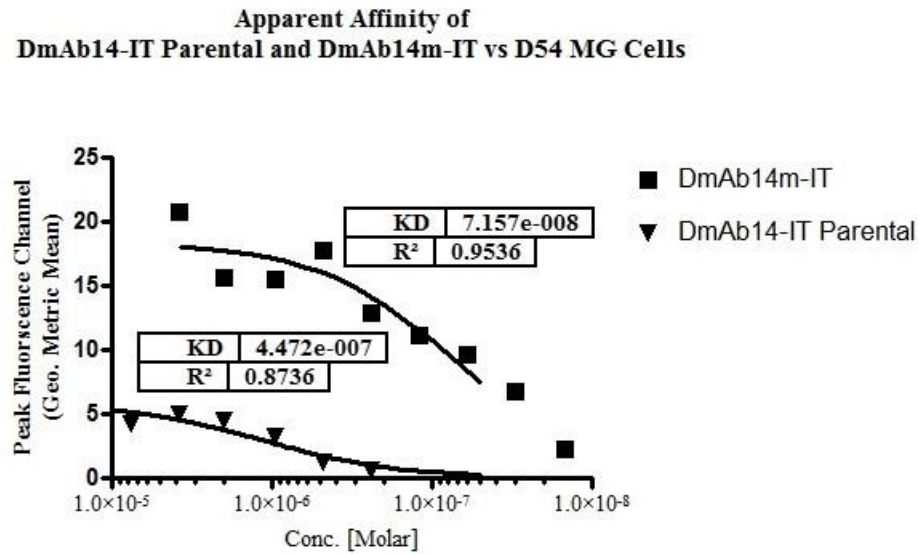

### Supplementary Figure 1. Binding affinity (apparent affinity $EC_{50}$ ) of $V_H$ CDR2 and $V_L$ CDR1 mutant immunotoxins on D54MG cells.

Binding affinity  $K_d$  (apparent affinity  $EC_{50}$ ) was measured by antibody dose dependent curve using flow cytometry to detect scFv immunotoxin binding against ganglioside-expressing D54MG cells. The  $K_d$  (apparent affinity  $EC_{50}$ ) values were labeled beside each curve.

## Supplementary Figure 2.

### Cytotoxicity of DmAb14m-IT on negative control HEK293 cells

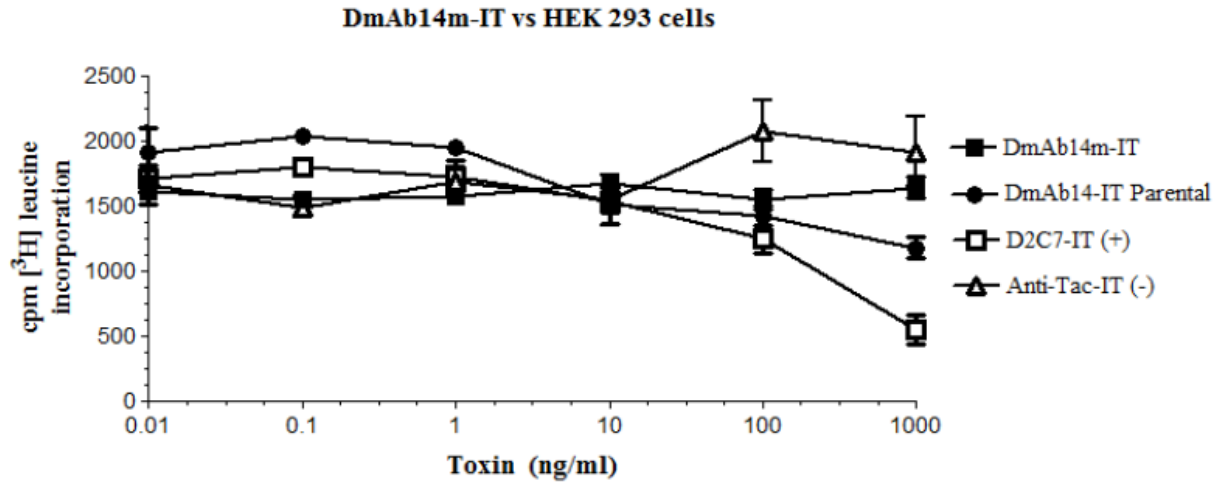

### Supplementary Figure 2. Cytotoxicity of immunotoxins on HEK293 cells.

Inhibition of protein synthesis was determined as percentage of [ $^3\text{H}$ ] leucine incorporation in HEK293 cells, after 20 hours of treatment with immunotoxins. The graph shows protein synthesis as measured by counts per minute of [ $^3\text{H}$ ] leucine incorporated into protein. The dashed line indicates 50% inhibition of protein synthesis, the point at which half of the [ $^3\text{H}$ ]-leucine has been incorporated in the absence of toxin.  $\text{IC}_{50}$  of the DmAb14m-IT on HEK293 cells is not applicable (Fig.2). The value shown is the mean  $\pm$  SD calculated from the means of three separate experiments.
